## RESEARCH ARTICLE

## Intraoperative hemoadsorption in high-risk patients with infective endocarditis

Zaki Haidari<sup>1\*</sup>, Ender Demircioglu<sup>1</sup>, Kristina Boss<sup>2</sup>, Bartosz Tyczynski<sup>2</sup>, Matthias Thielmann<sup>1</sup>, Bastian Schmack<sup>1</sup>, Andreas Kribben<sup>2</sup>, Alexander Weymann<sup>1</sup>, Mohamed El Gabry<sup>1</sup>, Arjang Ruhparwar<sup>1</sup>, Daniel Wendt<sup>1</sup>

**1** Department of Thoracic and Cardiovascular Surgery, West German Heart and Vascular Center Essen, Essen, Germany, **2** Department of Nephrology, University Hospital Essen, Essen, Germany

\* [zaki.haidari@uk-essen.de](mailto:zaki.haidari@uk-essen.de)

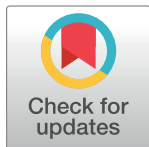

## Abstract

## Background

Postoperative sepsis is an important cause of morbidity and mortality in patients with infective endocarditis undergoing surgical therapy. Blood purification using hemoadsorption therapy shows promising results in the treatment of sepsis. In this study, the clinical effects of intraoperative hemoadsorption in high-risk patients with infective endocarditis were evaluated.

## Methods

Eligible candidates were high-risk patients with infective endocarditis undergoing cardiac surgery between January 2014 and December 2019. Patients with intraoperative hemoadsorption (hemoadsorption) were compared to patients without hemoadsorption (control). The endpoints were the incidence of postoperative sepsis, sepsis-associated death and in-hospital mortality. Additionally, postoperative vasopressor need, systemic vascular resistance indices and Sequential Organ Failure Assessment (SOFA) scores were compared.

## Results

After propensity score matching, 70 high-risk patients were included. Postoperative sepsis occurred in 14 patients in the hemoadsorption group and in 16 patients in the control group,  $p = 0.629$ . Four patients died due to postoperative sepsis in the hemoadsorption group, while 11 postoperative septic patients died in the control group,  $p = 0.041$ . In-hospital mortality was 34% in the hemoadsorption group versus 43% in the control group,  $p = 0.461$ . On ICU-admission and the first postoperative day, the cumulative vasopressor need was 0.17 versus 0.25  $\mu\text{g}/\text{kgBW}/\text{min}$ ,  $p = 0.123$  and 0.06 versus 0.11  $\mu\text{g}/\text{kgBW}/\text{min}$ ,  $p = 0.037$ , and the systemic vascular resistance index was 1448 versus 941  $\text{dyn}\cdot\text{s}\cdot\text{cm}^{-5}$ ,  $p = 0.013$  and 1156 versus 858  $\text{dyn}\cdot\text{s}\cdot\text{cm}^{-5}$ ,  $p = 0.110$  in the hemoadsorption versus control group, respectively. Postoperative course of SOFA score normalized significantly ( $p = 0.01$ ) faster in the hemoadsorption group.

## OPEN ACCESS

**Citation:** Haidari Z, Demircioglu E, Boss K, Tyczynski B, Thielmann M, Schmack B, et al. (2022) Intraoperative hemoadsorption in high-risk patients with infective endocarditis. PLoS ONE 17(7): e0266820. <https://doi.org/10.1371/journal.pone.0266820>

**Editor:** Lucio Careddu, Policlinico S. Orsola-Malpighi, ITALY

**Received:** August 20, 2021

**Accepted:** March 29, 2022

**Published:** July 28, 2022

**Copyright:** © 2022 Haidari et al. This is an open access article distributed under the terms of the [Creative Commons Attribution License](https://creativecommons.org/licenses/by/4.0/), which permits unrestricted use, distribution, and reproduction in any medium, provided the original author and source are credited.

**Data Availability Statement:** All relevant data are within the manuscript and its [Supporting Information](#) file.

**Funding:** The authors received no specific funding for this work.

**Competing interests:** The authors have declared that no competing interests exist.

## Conclusions

In high-risk cardiac surgical patients with infective endocarditis, intraoperative hemoadsorption significantly reduced sepsis-associated mortality. Furthermore, intraoperative hemoadsorption resulted in significant faster recovery of hemodynamics and organ function. Intraoperative hemoadsorption seems to attenuate the severity of postoperative sepsis.

## Introduction

Postoperative sepsis and subsequent organ failure is an important cause of mortality in patients undergoing cardiac surgery for infective endocarditis [1, 2]. Systemic inflammatory response in combination with systemic infection resulting in severe sepsis is orchestrated with the cytokines as messengers [3–12]. We previously reported that intraoperative hemoadsorption reduced the incidence of postoperative sepsis and sepsis-related death in patients with infective endocarditis of the native mitral valve undergoing surgical therapy [13]. Furthermore, we found that European System for Cardiac Operative Risk Evaluation (EuroSCORE) II was the only independent predictor of sepsis-related mortality. However, this novel adjunctive therapy concept requires further investigation in terms of patient selection and timing of application. In this study, we aimed to evaluate the clinical effects of intraoperative hemoadsorption in high-risk patients with infective endocarditis undergoing cardiac surgery.

## Methods

### Patients

Eligible participants for this retrospective study were patients with definitive infective endocarditis undergoing surgical therapy with cardiopulmonary bypass from January 2014 through to December 2019. The modified Duke criteria were followed to verify definite infective endocarditis [14]. Exclusion criteria were cardiac-device related infective endocarditis, requiring simple retraction without cardiopulmonary bypass. For every patient, the EuroSCORE II was calculated using the online calculator (<http://www.euroscore.org/calc.html>) and all patients with a EuroSCORE II >8% were selected for this study [15]. The study was reviewed and approved by the institutional ethics committee (19-8743-BO) and all patients provided written informed consent before the operation.

### Operation techniques

Cardiac surgery was performed under general anesthesia and endotracheal intubation. Preoperative transesophageal echocardiography was performed to evaluate cardiac and valvular function. Standard aortic and caval cannulation techniques were applied. Cardioplegic arrest was achieved by crystalloid Bretschneider cardioplegia (Custodiol, Dr. Franz Koehler Chemie, Bensheim, Germany). The addition of intraoperative hemoadsorption was decided by the operating surgeon and guided by multiple factors including preoperative clinical (e.g. fever) and inflammatory status, microbiological profile and perioperative hemodynamics. Patients with fever, high inflammatory parameters, presence of staphylococcal species as causative microorganism and high inotropic support were more likely to receive intraoperative hemoadsorption. In the cases selected for intraoperative hemoadsorption, a hemoadsorption device Cytosorb (Cytosorbents<sup>®</sup>, Monmouth Junction, NJ, USA) was installed in a parallel circuit of the cardiopulmonary bypass (CPB) machine during the surgical procedure.

## Hemoadsorption therapy

Hemoadsorption therapy with CytoSorb (Cytosorbents<sup>®</sup>, Monmouth Junction, NJ, USA) is based on extracorporeal blood purification that adsorbs excessive levels of inflammatory mediators with the aim to specifically modulate the overshooting immune response, mitigate the cytotoxic effects of elevated cytokine levels and increase the chances for recovery. The cartridge, which can be used as stand-alone or integrated into various extracorporeal circuits, such as continuous renal replacement therapy, CPB and extracorporeal membrane oxygenation (Fig 1), is filled with biocompatible, porous polymer beads covered with a divinylbenzen coating. Each polymer bead is between 300 and 800  $\mu\text{m}$  in size and has pores and channels, giving it a large (40,000  $\text{m}^2$ ) effective surface area for binding hydrophobic small and middle molecules.

## Postoperative care

All patients were referred to the cardiac surgical intensive care unit (ICU) with invasive hemodynamic and pulmonary monitoring, and guideline-directed antibiotic and supportive therapy. Hemodynamic monitoring included standard arterial, central venous and pulmonary artery catheter installation for invasive blood pressure and oxygen saturation measurement and cardiac output measurement by transpulmonary thermodilution. Furthermore, systemic

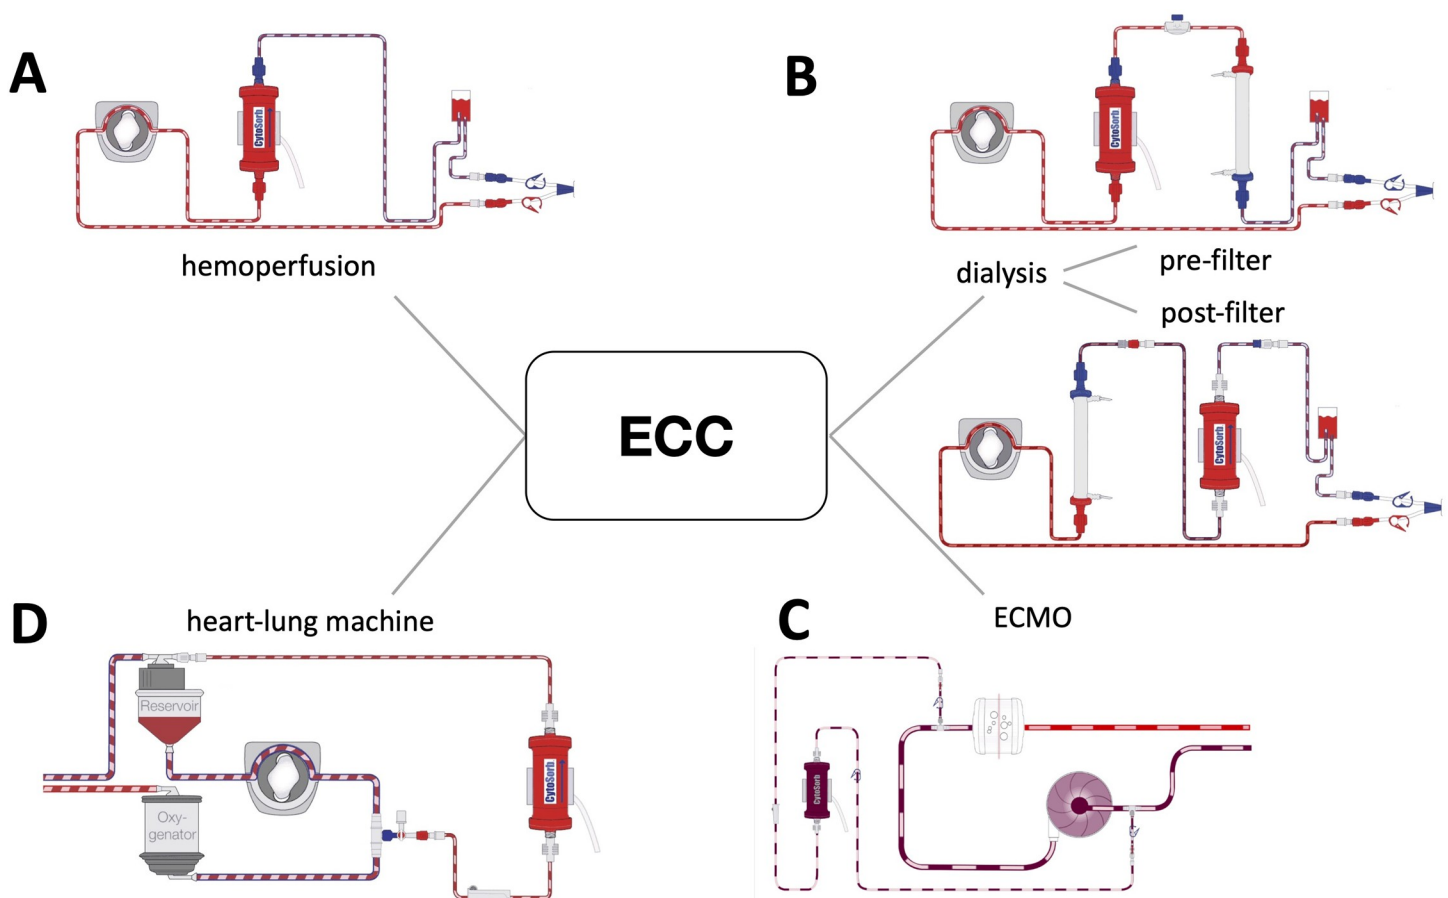

**Fig 1.** Potential incorporation modes of hemoadsorption in various extracorporeal circulation circuits (A: stand-alone, B: continuous renal replacement therapy, C: extracorporeal membrane oxygenation, D: cardiopulmonary bypass). ECC: extracorporeal circulation.

<https://doi.org/10.1371/journal.pone.0266820.g001>

vascular resistance index (SVRI) was calculated from data derived from invasive monitoring. Additionally, routinely measured lactate levels were used for the evaluation of the metabolic state. Fluid and vasopressor (primarily epinephrine and norepinephrine) therapy were guided by several factors, including blood pressure, heart rhythm, preoperative cardiac function, SVRI and metabolic parameters such as lactate measured by arterial blood gas analysis. Standard laboratory analysis included daily white blood counts (WBC), C-reactive protein (CRP) concentration and procalcitonin (PCT) measurement.

### Outcome measures

The primary endpoints of the study were the incidence of postoperative sepsis as defined by the third international consensus definitions for sepsis and septic shock, sepsis-related death and in-hospital mortality. In short, postoperative sepsis was defined as occurrence of new organ dysfunction. Septic shock was defined by a vasopressor requirement to maintain a mean arterial pressure of 65 mm Hg or greater and serum lactate level greater than 2 mmol/L in the absence of hypovolemia. Sepsis-related death was defined as in-hospital mortality due to sepsis and septic shock [16]. Secondary endpoints included postoperative need for mechanical circulatory support, organ failure, ICU- and hospital stay. Additionally, postoperative cumulative need for epinephrine and norepinephrine and SVR indices on ICU-admission and first postoperative day and postoperative course of inflammatory parameters and lactate were evaluated. Furthermore, individual Sequential Organ Failure Assessment (SOFA) Scores for each patient was assessed preoperatively and postoperatively up to seventh postoperative day. The SOFA score was calculated on a scale ranging from 0 to 6 for each organ system, resulting in a total score from 0 to 24 [17] and the investigators (Z.H. and D.W.) were blinded to treatment allocation.

### Statistical analysis

Data was analyzed using SPSS software version 25 (SPSS Inc., Chicago, IL, USA). A logistic regression analysis was performed to calculate the propensity score for the selection of patients for both the hemoadsorption and control groups. The variables used included age, left ventricular function, dialysis dependency, previous cardiac surgery, presence of prosthetic valve infective endocarditis, days between diagnosis and surgery, positive blood culture for staphylococcal species and application of postoperative hemoadsorption. Matching was performed using 1:1 nearest neighbor with a matching tolerance of 0.1 in the overall propensity score. Continuous variables were expressed as mean and median with standard deviation (SD) and interquartile range (IQR), respectively, and compared using Student's t-test or the Mann-Whitney test. Categorical data were expressed as number of patients and frequencies, and compared using the chi-square test. An analysis of variance (ANOVA) was computed for the SOFA score.

## Results

### Baseline characteristics

From January 2014 through December 2019, 248 patients underwent cardiac surgery with cardiopulmonary bypass for infective endocarditis. 104 patients were classified as high-risk patients as defined by the EuroSCORE II higher than 8%. After propensity score matching, 70 high-risk patients were included in this study (Fig 2). Preoperative baseline characteristics of the patients are outlined in Table 1. Median age at the time of operation was 73 years (IQR 60–78) and 69% of the patients were male. The median EuroSCORE II for the total population

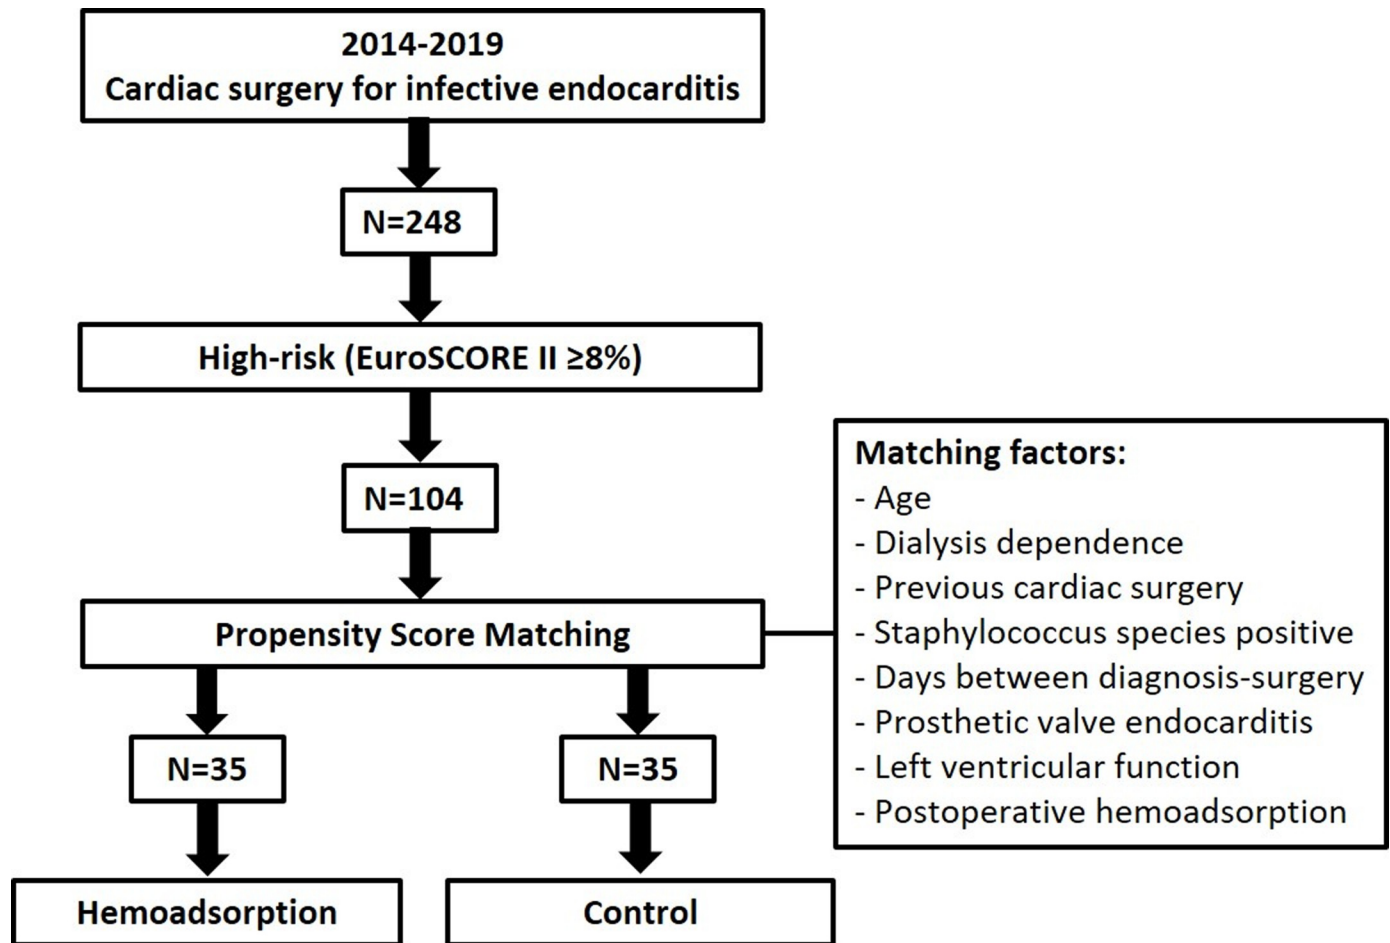

**Fig 2. Study flowchart.** EuroSCORE: European System for Cardiac Operative Risk Evaluation.

<https://doi.org/10.1371/journal.pone.0266820.g002>

was 15% (IQR 11–31). Median time between definitive diagnosis of infective endocarditis and surgery was 10 (IQR 5–25) days versus 14 days (IQR 3–26),  $P = 0.473$  in the hemoadsorption and the control group. Preoperative echocardiography showed preserved left ventricular fraction (LVEF > 50%) in 47 patients (67%) and poor (LVEF < 35%) left ventricular function in 4 patients (6%). Before induction of anesthesia, 13 patients were intubated and 12 patients needed vasopressor therapy. There were no significant differences in terms of demographics, hemodynamic and pulmonary status, the levels of preoperative inflammatory parameters and SOFA score between the two groups. Concomitant non-endocarditis valve disease requiring surgical therapy was present in 25 patients (5 aortic valve, 9 mitral valve and 11 tricuspid valve). The most commonly identified causative pathogen for infective endocarditis (Table 2) was staphylococcus species in 25 patients of which 20 patients with staphylococcus aureus.

### Operative characteristics

Table 3 represents operative characteristics of the two groups. Infective endocarditis affecting one valve was present in 59 patients, and two or three valves in 10 and one patient, respectively. Prosthetic valve infective endocarditis was present in 43 patients, 22 patients from the hemoadsorption group versus 21 patients in the control group, respectively. Concomitant

Table 1. Baseline characteristics.

| Variable                              | Hemoadsorption   | Control          | <i>p</i> |
|---------------------------------------|------------------|------------------|----------|
|                                       | N = 35           | N = 35           |          |
| <b>Demographics</b>                   |                  |                  |          |
| Age, years                            | 70±10            | 68±13            | 0.647    |
| Gender, male                          | 24 (69)          | 24 (69)          | 1.000    |
| Coronary artery disease               | 13 (37)          | 16 (46)          | 0.467    |
| Pulmonary disease                     | 8 (23)           | 7 (20)           | 0.771    |
| Dialysis dependent                    | 3 (9)            | 2 (6)            | 0.643    |
| Liver disease                         | 4 (11)           | 1 (3)            | 0.164    |
| Peripheral vascular disease           | 8 (23)           | 9 (26)           | 0.780    |
| Previous CABG                         | 7 (20)           | 7 (20)           | 1.000    |
| Previous PCI                          | 4 (11)           | 4 (11)           | 1.000    |
| Previous valve surgery                | 17 (49)          | 18 (37)          | 0.811    |
| EuroSCORE II                          | 14 (11–30)       | 19 (11–38)       | 0.339    |
| <b>Clinical status</b>                |                  |                  |          |
| NYHA III-IV                           | 21 (60)          | 17 (49)          | 0.337    |
| Intubated                             | 6 (17)           | 7 (20)           | 0.759    |
| Vasopressor need                      | 6 (17)           | 6 (17)           | 1.000    |
| SOFA score                            | 2 (2–4)          | 2 (1–4)          | 1.000    |
| <b>Inflammatory status</b>            |                  |                  |          |
| C-reactive protein, mg/dL             | 6.4 (3–11)       | 5.9 (1.08–9.23)  | 0.814    |
| Procalcitonin, ng/ml                  | 0.21 (0.08–0.62) | 0.31 (0.13–1.12) | 0.481    |
| White blood count, 10 <sup>9</sup> /L | 8.9 (6.6–11.7)   | 8.6 (6.4–12.9)   | 0.698    |

Data are presented as mean±SD, median (IQR) or number (%); CABG, coronary artery bypass grafting; PCI, percutaneous coronary intervention; EuroSCORE, European System for Cardiac Operative Risk Evaluation; NYHA, New York Heart Association; SOFA, Sequential Organ Failure Assessment

<https://doi.org/10.1371/journal.pone.0266820.t001>

coronary artery bypass grafting was performed in 13 patients. Cardiopulmonary bypass and aortic cross-clamp times were comparable.

## Endpoints

The endpoints are summarized in Table 4. Postoperative sepsis occurred in 14 (40%) patients in the hemoadsorption and in 16 patients (46%) in the control group (OR: 0.792, CI: 0.307–2.044, *p* = 0.629). Sepsis-related death occurred in four patients in the hemoadsorption group and in 11 patients in the control group (OR: 0.282, CI: 0.080–0.995, *p* = 0.041). In-hospital

Table 2. Microbiological profile.

| Variable               | Hemoadsorption | Control | <i>p</i> |
|------------------------|----------------|---------|----------|
|                        | N = 35         | N = 35  |          |
| Staphylococcus species | 12 (34)        | 13 (37) | 0.803    |
| Staphylococcus aureus  | 10 (29)        | 10 (29) | 1.000    |
| Streptococcus species  | 8 (23)         | 1 (3)   | 0.012    |
| Enterococcus species   | 9 (26)         | 9 (26)  | 1.000    |
| Others                 | 2 (6)          | 3 (9)   | 0.643    |
| Negative culture       | 4 (11)         | 9 (26)  | 0.124    |

Data are presented as number (%)

<https://doi.org/10.1371/journal.pone.0266820.t002>

**Table 3. Operative characteristics.**

| Variable                             | Hemoadsorption | Control       | <i>p</i> |
|--------------------------------------|----------------|---------------|----------|
|                                      | N = 35         | N = 35        |          |
| Isolated AV procedure                | 8 (23)         | 8 (23)        | 1.000    |
| Combined AV and MV procedure         | 5 (14)         | 3 (9)         | 0.452    |
| Combined AV and TV procedure         | 5 (14)         | 3 (9)         | 0.452    |
| Combined MV and TV procedure         | 4 (11)         | 8 (23)        | 0.205    |
| Combined AV, MV and TV procedure     | 2 (6)          | 3 (9)         | 0.643    |
| Concomitant CABG                     | 4 (11)         | 9 (26)        | 0.124    |
| Cardiopulmonary bypass time, minutes | 127 (105–177)  | 138 (108–195) | 0.459    |
| Aortic cross-clamp time, minutes     | 84 (69–118)    | 82 (67–121)   | 0.883    |

Data are presented as number (%) or median (IQR); AV, aortic valve; MV, mitral valve; TV, tricuspid valve CABG, coronary artery bypass grafting

<https://doi.org/10.1371/journal.pone.0266820.t003>

mortality was 34% in the hemoadsorption group and 43% in the control group (OR: 0.696, CI: 0.264–1.830,  $p = 0.461$ ). Other causes of in-hospital mortality in the hemoadsorption group were one intraoperative left ventricular posterior wall rupture, one left and one right heart failure, two in-hospital cardiac arrests, three septic shocks due to secondary infection (one candida albicans infection, one unknown, and one deep sternal wound infection, all not related to the index pathogen and to endocarditis). Other causes of death in the control group were one intraoperative left ventricular posterior wall rupture, one cardiogenic shock and two secondary infections (one respiratory failure due to herpes simplex virus pneumonia and one deep sternal wound infection).

Mechanical circulatory support with extracorporeal membrane oxygenation (ECMO) was necessary in four patients, two in the hemoadsorption group and two in the control group,  $p = 1.000$ . Intra-aortic balloon pump (IABP) support was applied in six patients, two in the hemoadsorption group and four in the control group,  $p = 0.393$ . One patient received both ECMO and IABP support. Postoperative new renal failure requiring hemodialysis was present in 20 patients, nine in the hemoadsorption group and 11 in the control group,  $p = 0.649$ . Respiratory failure requiring reintubation occurred in 20 patients, six in the hemoadsorption group and 14 in the control group,  $p = 0.034$ . Among all in-hospital deaths ( $N = 27$ ), 13 patients developed respiratory failure, three in the hemoadsorption group and 10 in the control group,

**Table 4. Endpoints.**

| Variable                    | Hemoadsorption | Control    | <i>p</i> |
|-----------------------------|----------------|------------|----------|
|                             | N = 35         | N = 35     |          |
| <b>Primary</b>              |                |            |          |
| Sepsis                      | 14 (40)        | 16 (46)    | 0.629    |
| Sepsis-associated mortality | 4 (11)         | 11 (31)    | 0.041    |
| In-hospital mortality       | 12 (34)        | 15 (43)    | 0.461    |
| <b>Secondary</b>            |                |            |          |
| Postoperative IABP/ECMO     | 4 (11)         | 5 (14)     | 0.721    |
| Dialysis                    | 9 (26)         | 11 (31)    | 0.649    |
| Reintubation                | 6 (17)         | 14 (40)    | 0.034    |
| ICU-stay, days              | 7 (4–11)       | 8 (5–15)   | 0.228    |
| Hospital stay, days         | 13 (8–18)      | 15 (11–20) | 0.195    |

Data are presented as number (%) or median (IQR) IABP, intra-aortic balloon-pump; ECMO, extracorporeal membrane oxygenation; ICU, intensive care unit.

<https://doi.org/10.1371/journal.pone.0266820.t004>

$p = 0.031$ . There were no clinical relevant differences in the ICU- and hospital stay between the groups.

On ICU-admission, the cumulative need for epinephrine and norepinephrine (Fig 3A) was  $0.17 \mu\text{g}/\text{kgBW}/\text{min}$  (IQR 0.10–0.30) in the hemoadsorption group and  $0.25 \mu\text{g}/\text{kgBW}/\text{min}$  (IQR 0.12–0.52) in the control group,  $p = 0.123$ . On postoperative day 1, the median need for epinephrine and norepinephrine decreased to  $0.06 \mu\text{g}/\text{kgBW}/\text{min}$  (IQR 0.00–0.13) in the hemoadsorption group and  $0.11 \mu\text{g}/\text{kgBW}/\text{min}$  (IQR 0.03–0.38) in the control group,  $p = 0.037$ . Furthermore, an SVRI (Fig 3B) of  $1448 \text{ dyn}\cdot\text{s}\cdot\text{cm}^{-5}$  (1133–2065) in the hemoadsorption group versus  $941 \text{ dyn}\cdot\text{s}\cdot\text{cm}^{-5}$  (IQR 788–1521) in the control group was observed on ICU-admission,  $p = 0.013$ . On postoperative day 1, the SVRI had decreased to  $1156 \text{ dyn}\cdot\text{s}\cdot\text{cm}^{-5}$  (782–1695) in the hemoadsorption group and in the control group it had decreased to  $858 \text{ dyn}\cdot\text{s}\cdot\text{cm}^{-5}$  (715–1340),  $p = 0.110$ .

The inflammatory parameters (Fig 4) increased postoperatively in both groups abruptly and peaked on the second postoperative day. PCT levels (Fig 4A) were higher (not statistically significant) in the hemoadsorption group than in the control group. CRP (Fig 4B) and WBC (Fig 4C) showed a comparable course between the two groups with no significant differences. Lactate levels (Fig 4D) on the first postoperative day were lower in the hemoadsorption group compared to the control group, however it did not reach statistical significance.

In regard to the SOFA scores (Fig 5), we observed a significant ( $p < 0.001$ ) increase in both groups on the day of operation compared to preoperatively. However, the SOFA score decreased in the hemoadsorption group to preoperative levels in the first seven postoperative days. In the control group, the SOFA score remained high during the first week after the operation. The course of SOFA score was significantly ( $p = 0.01$ ) in favor of the hemoadsorption group.

## Discussion

In the current comparative study, we sought to evaluate the clinical effects of intraoperative hemoadsorption in high-risk patients with infective endocarditis undergoing surgical therapy. Although intraoperative hemoadsorption did not reduce the incidence of postoperative sepsis,

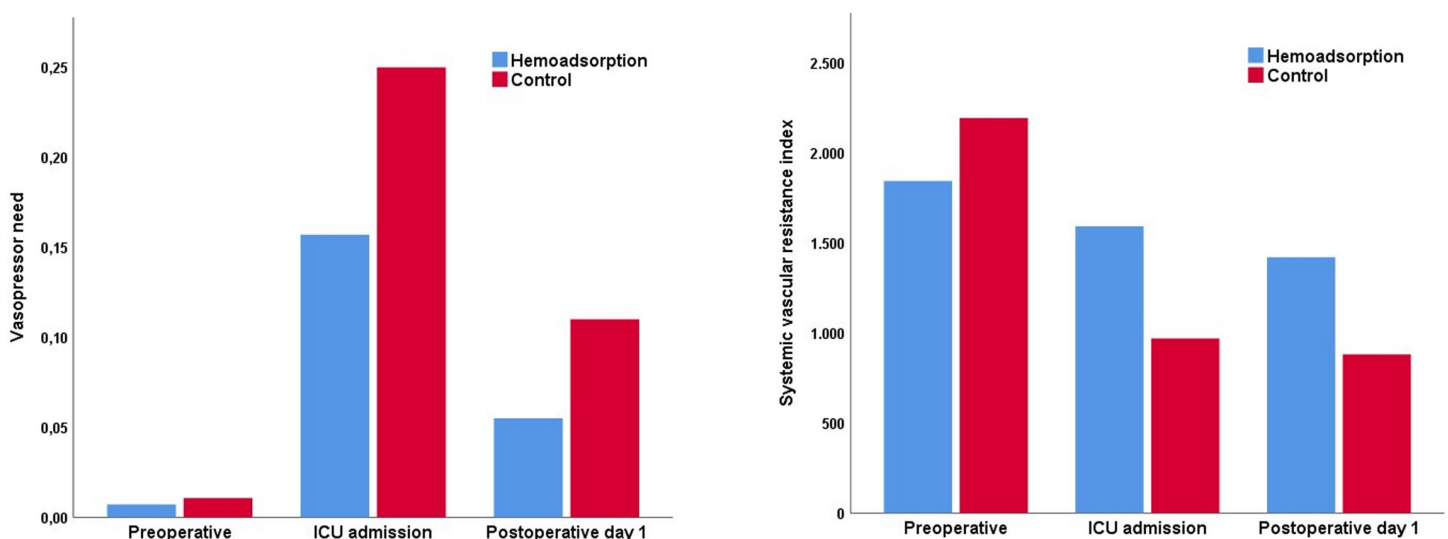

**Fig 3.** Median vasopressor need in  $\mu\text{g}/\text{kgBW}/\text{min}$  (A) and systemic vascular resistance index in  $\text{dyn}\cdot\text{s}\cdot\text{cm}^{-5}$  (B). ICU: intensive care unit.

<https://doi.org/10.1371/journal.pone.0266820.g003>



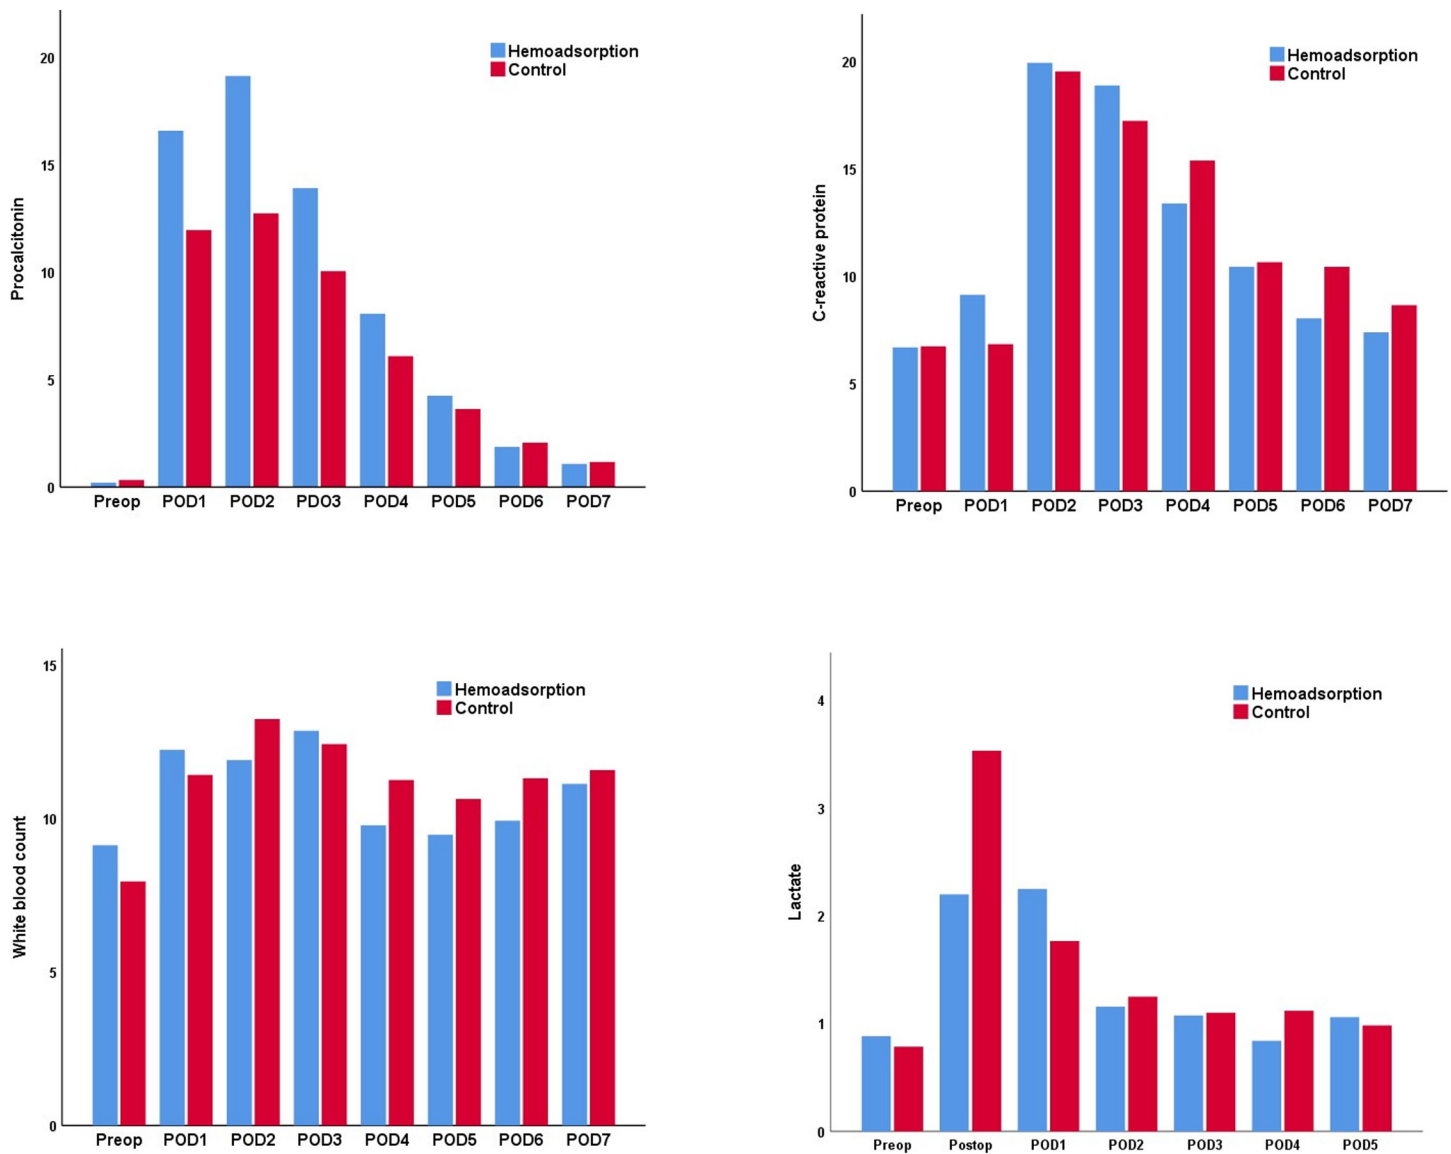

**Fig 4.** Median levels of procalcitonin in ng/ml (A), C-reactive protein in mg/dl (B), white blood count x1000/ml (C) and lactate in mmol/l (D). POD: postoperative day.

<https://doi.org/10.1371/journal.pone.0266820.g004>

sepsis-associated death was significantly lower in patients with intraoperative hemoadsorption therapy than in the control group. Additionally, this difference was reinforced by the favorable hemodynamic parameters and reintubation rates in patients receiving intraoperative hemoadsorption. Furthermore, the SOFA score showed significant faster normalization during the postoperative course in the hemoadsorption group.

Postoperative sepsis remains an important cause of mortality in patients with infective endocarditis undergoing surgical therapy. In our previous report, the use of intraoperative hemoadsorption in patients with native mitral valve infective endocarditis seemed to reduce the incidence of postoperative sepsis and sepsis-associated death, which was supported by more stable hemodynamic, metabolic and inflammatory statuses in patients receiving intraoperative hemoadsorption [13]. In the current study, the incidence of postoperative sepsis was comparable between the two groups. However, sepsis-related mortality was significantly

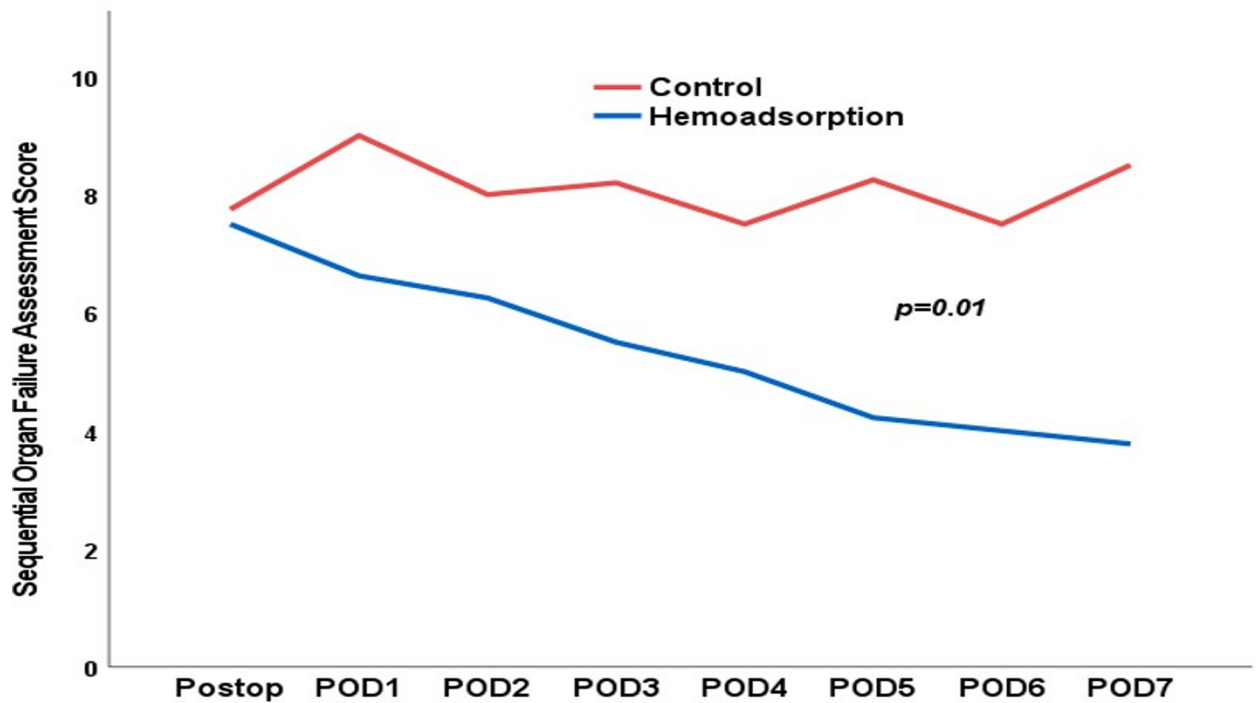

Fig 5. Postoperative course of SOFA score. SOFA: Sequential Organ Failure Assessment.

<https://doi.org/10.1371/journal.pone.0266820.g005>

reduced in patients with intraoperative hemoadsorption. This observation was supported by faster recovery of cardiopulmonary status and SOFA scores in the hemoadsorption as compared to the control group. These data suggest that hemoadsorption therapy attenuates the severity of sepsis in high-risk patients, thus preventing development of septic shock leading to death. Overall in-hospital mortality was high and comparable between the two groups. Among the in-hospital deaths, five patients died due to secondary infections, three in the hemoadsorption group and two in the control group. Secondary infections after cardiac surgery occur due to the biphasic immune response, in which the second phase is dominated by an anti-inflammatory reaction [18, 19]. Additionally, in the hemoadsorption group two patients died unexpectedly due to in-hospital cardiac arrest after a hospital transfer where they had been in a stable condition.

An interesting observation was that respiratory failure occurred significantly less often in the hemoadsorption group than in the control group. These data are consistent with previous studies showing that patients with infective endocarditis are at increased risk for developing postoperative respiratory failure, and postoperative respiratory failure is an important predictive factor of morbidity and mortality [20, 21].

Hemoadsorption during cardiopulmonary bypass is currently a frequent theme of clinical research in cardiac surgery. Hemoadsorption therapy has been shown to reduce circulating cytokines at various levels [22–25]. The variability in the results could be explained by the study design and sample size, patient characteristics, and timing and duration of the therapy. Although patients with infective endocarditis have higher concentrations of cytokines [5, 26], evaluation of intraoperative hemoadsorption therapy in patients with infective endocarditis is less studied in the literature. In these two retrospective studies, intraoperative hemoadsorption seemed to reduce the severity of postoperative sepsis and sepsis-associated mortality by stabilizing hemodynamics and inflammatory response [13, 27]. It should be kept in mind that

removal of circulating cytokines only has an impact on inflammatory response. Although postoperative sepsis is an important cause of surgical mortality, mortality by other causes cannot be prevented by hemoadsorption therapy.

Currently, two randomized controlled clinical trials are currently ongoing to evaluate the effects of intraoperative hemoadsorption therapy in patients with infective endocarditis [28, 29]. The primary endpoints of these two randomized trials are focused on Sequential Organ Failure Assessment and monocytic human leukocyte antigen-DR expression. In our study, the focus was on the clinical effects of intraoperative hemoadsorption in high-risk patients with infective endocarditis. Although this study is not a randomized clinical trial, the two groups of patients were comparable after propensity score matching. Nevertheless, bias cannot be completely excluded. Further, the retrospective design precluded routine evaluation of the whole cytokine panel, such as TNF $\alpha$ , IL-6 or IL-1 $\beta$ . Nonetheless, this is to the best of our knowledge the largest and first study to evaluate intraoperative hemoadsorption in a high-risk cohort undergoing cardiac surgery for infective endocarditis thus far. Regarding high-risk definition, the cutoff point for determining high-risk patients was set at a EuroSCORE II greater than 8% as the EuroSCORE II overestimates the operative mortality in cardiac surgical patients [30, 31]. In order to compensate for this overestimation, we defined a high-risk patients as higher than 6% as in other studies.

In conclusion, intraoperative hemoadsorption seems to attenuate the severity of postoperative sepsis and reduce sepsis-associated mortality in high-risk patients undergoing surgical therapy for infective endocarditis. Future studies are mandatory to confirm the current results in a larger population and to explore the underlying mechanisms behind these effects.

## Supporting information

**S1 Data.**  
(XLSX)

## Author Contributions

**Conceptualization:** Zaki Haidari.

**Data curation:** Zaki Haidari, Kristina Boss.

**Formal analysis:** Zaki Haidari.

**Investigation:** Zaki Haidari.

**Methodology:** Zaki Haidari, Ender Demircioglu.

**Project administration:** Zaki Haidari.

**Supervision:** Bartosz Tyczynski, Matthias Thielmann, Bastian Schmack, Andreas Kribben, Alexander Weymann, Mohamed El Gabry, Arjang Ruhparwar, Daniel Wendt.

**Writing – original draft:** Zaki Haidari.

**Writing – review & editing:** Zaki Haidari, Ender Demircioglu, Kristina Boss, Bastian Schmack, Andreas Kribben, Alexander Weymann, Mohamed El Gabry.

## References

1. Mirabel M, Sonnevile R, Hajage D, et al. Long-term outcomes and cardiac surgery in critically ill patients with infective endocarditis. *Eur Heart J.* 2014; 35:1195–1204. <https://doi.org/10.1093/eurheartj/eh303> PMID: 23964033

2. Farag M, Borst T, Sabashnikov A, et al. Surgery for Infective Endocarditis: Outcomes and Predictors of Mortality in 360 Consecutive Patients. *Med Sci Monit*. 2017; 23:3617–3626. <https://doi.org/10.12659/msm.902340> PMID: 28740070
3. Kumar A, Anstey C, Tesar P, Shekar K. Risk Factors for Mortality in Patients Undergoing Cardiothoracic Surgery for Infective Endocarditis. *Ann Thorac Surg*. 2019; 108:1101–1106. <https://doi.org/10.1016/j.athoracsur.2019.05.029> PMID: 31276645
4. Jakuska P, Ereminiene E, Muliulyte E, et al. Predictors of early mortality after surgical treatment of infective endocarditis: a single-center experience. *Perfusion*. 2020; 35:290–296. <https://doi.org/10.1177/0267659119872345> PMID: 31480970
5. Diab M, Tasar R, Sponholz C, et al. Changes in inflammatory and vasoactive mediator profiles during valvular surgery with or without infective endocarditis: A case control pilot study. *PLoS One*. 2020; 15:e0228286. <https://doi.org/10.1371/journal.pone.0228286> PMID: 32015566
6. McGuinness J, Bouchier-Hayes D, Redmond JM. Understanding the inflammatory response to cardiac surgery. *Surgeon*. 2008; 6:162–171. [https://doi.org/10.1016/s1479-666x\(08\)80113-8](https://doi.org/10.1016/s1479-666x(08)80113-8) PMID: 18581753
7. Day JR, Taylor KM. The systemic inflammatory response syndrome and cardiopulmonary bypass. *Int J Surg*. 2005; 3:129–140. <https://doi.org/10.1016/j.ijso.2005.04.002> PMID: 17462274
8. Levy JH, Tanaka KA. Inflammatory response to cardiopulmonary bypass. *Ann Thorac Surg*. 2003; 75:S715–S720. [https://doi.org/10.1016/s0003-4975\(02\)04701-x](https://doi.org/10.1016/s0003-4975(02)04701-x) PMID: 12607717
9. Paparella D, Yau TM, Young E. Cardiopulmonary bypass induced inflammation: pathophysiology and treatment. An update. *Eur J Cardiothorac Surg*. 2002; 21:232–44. [https://doi.org/10.1016/s1010-7940\(01\)01099-5](https://doi.org/10.1016/s1010-7940(01)01099-5) PMID: 11825729
10. Salsano A, Giacobbe DR, Sportelli E, et al. Aortic cross-clamp time and cardiopulmonary bypass time: prognostic implications in patients operated on for infective endocarditis. *Interact Cardiovasc Thorac Surg*. 2018; 27:328–335. <https://doi.org/10.1093/icvts/ivy085> PMID: 29579243
11. Cremer J, Martin M, Redl H, et al. Systemic inflammatory response syndrome after cardiac operations. *Ann Thorac Surg*. 1996; 61:1714–1720. [https://doi.org/10.1016/0003-4975\(96\)00055-0](https://doi.org/10.1016/0003-4975(96)00055-0) PMID: 8651772
12. Casey LC. Role of cytokines in the pathogenesis of cardiopulmonary-induced multisystem organ failure. *Ann Thorac Surg*. 1993; 56:S92–S96. [https://doi.org/10.1016/0003-4975\(93\)91143-b](https://doi.org/10.1016/0003-4975(93)91143-b) PMID: 8239845
13. Haidari Z, Wendt D, Thielmann M, et al. Intraoperative Hemoadsorption in Patients With Native Mitral Valve Infective Endocarditis. *Ann Thorac Surg*. 2020; 110:890–896. <https://doi.org/10.1016/j.athoracsur.2019.12.067> PMID: 32059855
14. Li JS, Sexton DJ, Mick N, et al. Proposed modifications to the Duke criteria for the diagnosis of infective endocarditis. *Clin Infect Dis*. 2000; 30:633–638. <https://doi.org/10.1086/313753> PMID: 10770721
15. Nashef SA, Roques F, Sharples LD, Nilsson J, Smith C, Goldstone AR, et al. EuroSCORE II. *Eur J Cardiothorac Surg*. 2012; 41:734–745. <https://doi.org/10.1093/ejcts/ezs043> PMID: 22378855
16. Singer M, Deutschman CS, Seymour CW, et al. The Third International Consensus Definitions for Sepsis and Septic Shock (Sepsis-3). *JAMA*. 2016; 315:801–810. <https://doi.org/10.1001/jama.2016.0287> PMID: 26903338
17. Raith EP, Udy AA, Bailey M, et al. Prognostic Accuracy of the SOFA Score, SIRS Criteria, and qSOFA Score for In-Hospital Mortality Among Adults With Suspected Infection Admitted to the Intensive Care Unit. *JAMA*. 2017; 317:290–300. <https://doi.org/10.1001/jama.2016.20328> PMID: 28114553
18. Franke A, Lante W, Fackeldey V, et al. Proinflammatory and antiinflammatory cytokines after cardiac operation: different cellular sources at different times. *Ann Thorac Surg*. 2002; 74:363–371. [https://doi.org/10.1016/s0003-4975\(02\)03658-5](https://doi.org/10.1016/s0003-4975(02)03658-5) PMID: 12173814
19. Börgermann J, Friedrich I, Scheubel R, et al. Granulocyte-macrophage colony-stimulating factor (GM-CSF) restores decreased monocyte HLA-DR expression after cardiopulmonary bypass. *Thorac Cardiovasc Surg*. 2007; 55:24–31. <https://doi.org/10.1055/s-2006-924621> PMID: 17285470
20. Bailey ML, Richter SM, Mullany DV, Tesar PJ, Fraser JF. Risk factors and survival in patients with respiratory failure after cardiac operations. *Ann Thorac Surg*. 2011; 92:1573–1579. <https://doi.org/10.1016/j.athoracsur.2011.04.019> PMID: 21855851
21. Filsoufi F, Rahmanian PB, Castillo JG, Chikwe J, Adams DH. Logistic risk model predicting postoperative respiratory failure in patients undergoing valve surgery. *Eur J Cardiothorac Surg*. 2008; 34:953–959. <https://doi.org/10.1016/j.ejcts.2008.07.061> PMID: 18835184
22. Träger K, Fritzler D, Fischer G, et al. Treatment of post-cardiopulmonary bypass SIRS by hemoadsorption: a case series. *Int J Artif Organs*. 2016; 39:141–146. <https://doi.org/10.5301/ijao.5000492> PMID: 27140295
23. Garau I, März A, Sehner S, et al. Hemadsorption during cardiopulmonary bypass reduces interleukin 8 and tumor necrosis factor a serum levels in cardiac surgery: a randomized controlled trial. *Minerva Anesthesiol*. 2019; 85:715–723. <https://doi.org/10.23736/S0375-9393.18.12898-7> PMID: 30481999

24. Poli EC, Alberio L, Bauer-Doerries A, et al. Cytokine clearance with CytoSorb® during cardiac surgery: a pilot randomized controlled trial. *Crit Care*. 2019; 23:108–119. <https://doi.org/10.1186/s13054-019-2399-4> PMID: 30944029
25. Bernardi MH, Rinoesi H, Dragosits K, et al. Effect of hemoadsorption during cardiopulmonary bypass surgery—a blinded, randomized, controlled pilot study using a novel adsorbent. *Crit Care*. 2016; 20:96–109. <https://doi.org/10.1186/s13054-016-1270-0> PMID: 27059056
26. Araújo IR, Ferrari TC, Teixeira-Carvalho A, et al. Cytokine Signature in Infective Endocarditis. *PLoS One*. 2015; 10:e0133631. <https://doi.org/10.1371/journal.pone.0133631> PMID: 26225421
27. Träger K, Skrabal C, Fischer G, et al. Hemoadsorption treatment of patients with acute infective endocarditis during surgery with cardiopulmonary bypass—a case series. *Int J Artif Organs*. 2017; 40:240–249. <https://doi.org/10.5301/ijao.5000583> PMID: 28525670
28. Diab M, Platzer S, Guenther A, et al. Assessing efficacy of CytoSorb haemoabsorber for prevention of organ dysfunction in cardiac surgery patients with infective endocarditis: REMOVE-protocol for randomised controlled trial. *BMJ Open*. 2020; 10:e031912. <https://doi.org/10.1136/bmjopen-2019-031912> PMID: 32234739
29. Gisler F, Spinetti T, Erdoes G, et al. Cytokine Removal in Critically Ill Patients Requiring Surgical Therapy for Infective Endocarditis (RECREATE): An Investigator-initiated Prospective Randomized Controlled Clinical Trial Comparing Two Established Clinical Protocols. *Medicine (Baltimore)*. 2020; 99:e19580. <https://doi.org/10.1097/MD.00000000000019580> PMID: 32282706
30. Carino D, Denti P, Ascione G, et al. Is the EuroSCORE II reliable in surgical mitral valve repair? A single-centre validation study. *Eur J Cardiothorac Surg*. 2021; 59:863–868. <https://doi.org/10.1093/ejcts/ezaa403> PMID: 33313790
31. Guillet L, Moury PH, Bedague D, et al. Comparison of the additive, logistic european system for cardiac operative risk (EuroSCORE) with the EuroSCORE 2 to predict mortality in high-risk cardiac surgery. *Ann Card Anaesth*. 2020; 23:277–282. [https://doi.org/10.4103/aca.ACA\\_209\\_18](https://doi.org/10.4103/aca.ACA_209_18) PMID: 32687082
